**Title of Manuscript:** Mpox: Seroepidemiology and risk factors amidst increasing cases in Ghana

**List of authors**

Irene Owusu Donkor, Christopher Dorcoo, Grace Opoku Gyamfi, Jeffrey Gabriel Sumbah, Ama Akyampomaa Owusu Asare, Sally-ann Ohene, Joseph H. K. Bonney, Vincent Munster Robert Fischer

**Withdrawal Statement**

The authors have withdrawn their manuscript to run confirmatory assays to confirm the initial results obtained. Therefore, the authors do not wish this work to be cited as a reference for the project. If you have any questions, please contact the corresponding author. The authors will resubmit an updated version of the manuscript in due time.
